# Supplementary material
Source: MDPI journal article supplement (https://www.mdpi.com/2227-7390/9/23/3090)
Supplement: s1 [file s1]

Archive with 5 entries (5 files):
- S1S2 Protocol.pdf
- S2_GrayZoneRotation.mkv
- S3_ScarRotation2.mkv
- S4_DymamicInstability1.mkv
- S5_DynamicInstability2.mkv
