# Supplementary material
Source: MDPI journal article supplement (https://www.mdpi.com/2227-7390/9/23/3090)
Supplement: s1 [file s1 › S1S2 Protocol.pdf]

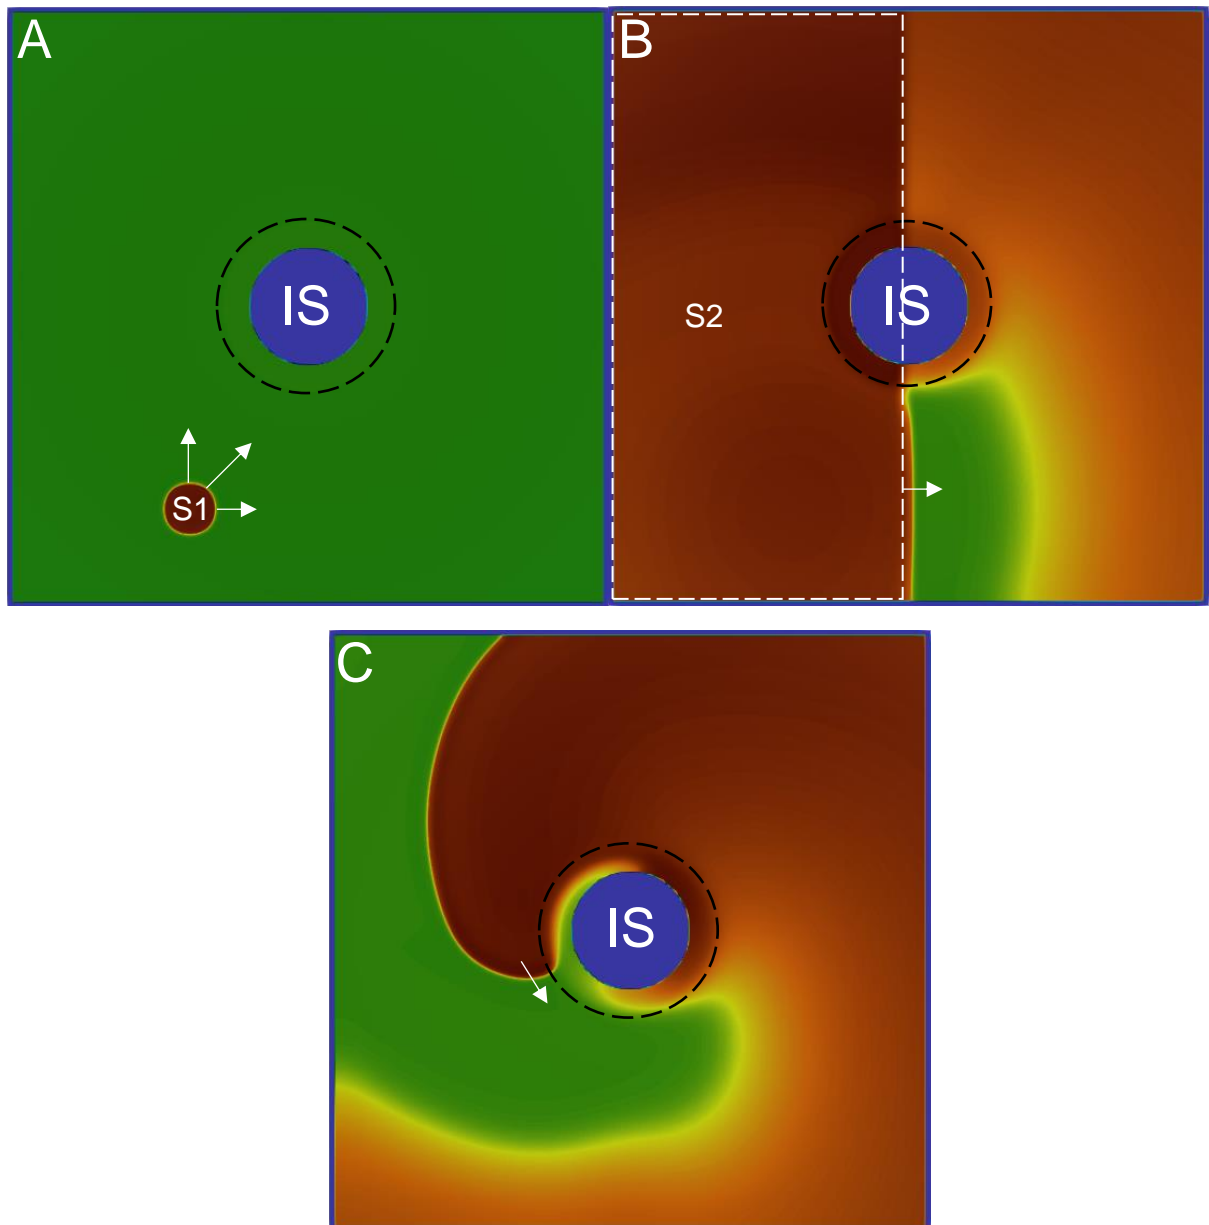

**Figure S1.** Illustration of wave initiation by the standard S1S2 protocol in 2D patch of cardiac tissue. Blue circle is the zone of post-infarction scar (IS). Black dashed circle shows the border of the gray zone. A: S1 stimulus is applied to a small area of the tissue at lower left quadrant. B: A second stimulus (S2, white dashed rectangle) applied to left half of the patch. If applied at certain moment, then the right arm of the propagating wave if above the obstacle and the tissue below the obstacle is recovered, it causes waveblock above the obstacle and a wave propagating to the right below the obstacle. As result, we obtain formation of counterclockwise rotational activity shown in fig. C: Wave rotating around the post-infarction scar.
